# Supplementary material for: SIAMESE Cooperates With the CDH1-like Protein CCS52A1 to Establish Endoreplication in Arabidopsis thaliana Trichomes
Source: Oxford University Press journal article supplement (doi:10.1534/genetics.109.113274), 2010-03-02
Supplement: 113274_si.pdf [file 113274_si.pdf]

# GENETICS

Supporting Information

<http://www.genetics.org/cgi/content/full/genetics.109.113274/DC1>

**SIAMESE Cooperates With the CDH1-like Protein CCS52A1  
to Establish Endoreplication in *Arabidopsis thaliana* Trichomes**

**Remmy Kasili, Jason D. Walker, L. Alice Simmons, Jing Zhou, Lieven De Veylder  
and John C. Larkin**

Copyright © 2010 by the Genetics Society of America  
DOI: 10.1534/genetics.109.113274

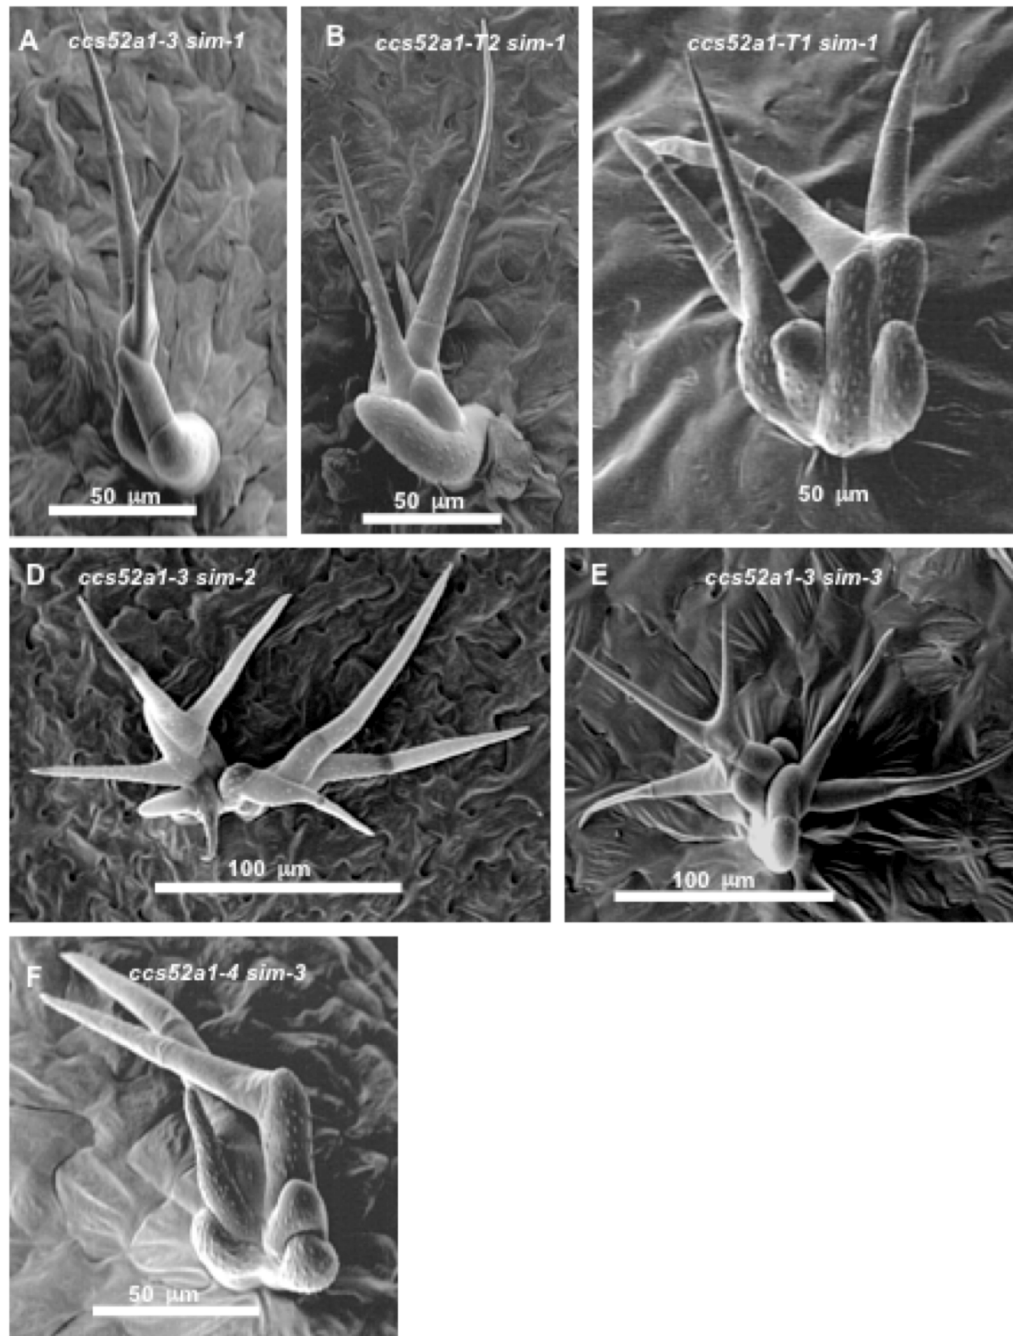

FIGURE S1.—Genetic interaction between *ccs52a1* and *sim* is not allele-specific. (A) *ccs52a1-3 sim-1*. (B) *ccs52a1-T2 sim-1*. (C) *ccs52a1-T1 sim-1*. (D) *ccs52a1-3 sim-2*. (E) *ccs52a1-3 sim-3*. (F) *ccs52a1-4 sim-3*. All images are scanning electron micrographs. Scale bars in (A), (B), (C) and (F) are 50 μm, and in (D) and (E), 100 μm.

**TABLE S1**  
**Primers Used For Mapping and Cloning**

| Primer    | Sequence                          | Purpose                             |
|-----------|-----------------------------------|-------------------------------------|
| F7H19-3aF | 5'-GCTAATGCGTCGTAGTGT-3'          | F7H19 CAPS marker                   |
| F7H19-3aR | 5'-GCAGAACGACTCCTGAAT-3'          | F7H19 CAPS marker                   |
| T12H17-2F | 5'-AACCATCCATAGCCGCCG-3'          | T12H17 CAPS marker                  |
| T12H17-2R | 5'-CGACATCTCCTTGCGTTGTGG-3'       | T12H17 CAPS marker                  |
| ENS2-1CF  | 5'-CACCAGGTGTCAATGGTGGGTC-3'      | CCS52A1 genomic for complementation |
| ENS2-1CR3 | 5'-GTCGGTGTAACGGTGAGAAAC-3'       | CCS52A1 genomic for complementation |
| ENS2-1F   | 5'-CACCATGGAAGAAGAAGATCCTACAGC-3' | CCS52A1 coding                      |
| ENS2-1R1  | 5'-TTCTCACCGAATTGTTGTTCTACC-3'    | CCS52A1 coding                      |

Primers ENS2-1CF, ENS2-1F, have the sequence 5'-CACC-3' at their 5' ends for directional cloning into the GATEWAY entry vector pENTR/D-TOPO (Invitrogen).
