# Supplementary material for: SIAMESE Cooperates With the CDH1-like Protein CCS52A1 to Establish Endoreplication in Arabidopsis thaliana Trichomes
Source: Oxford University Press journal article supplement (doi:10.1534/genetics.109.113274), 2010-03-02
Supplement: figures1.pdf [file figures1.pdf]

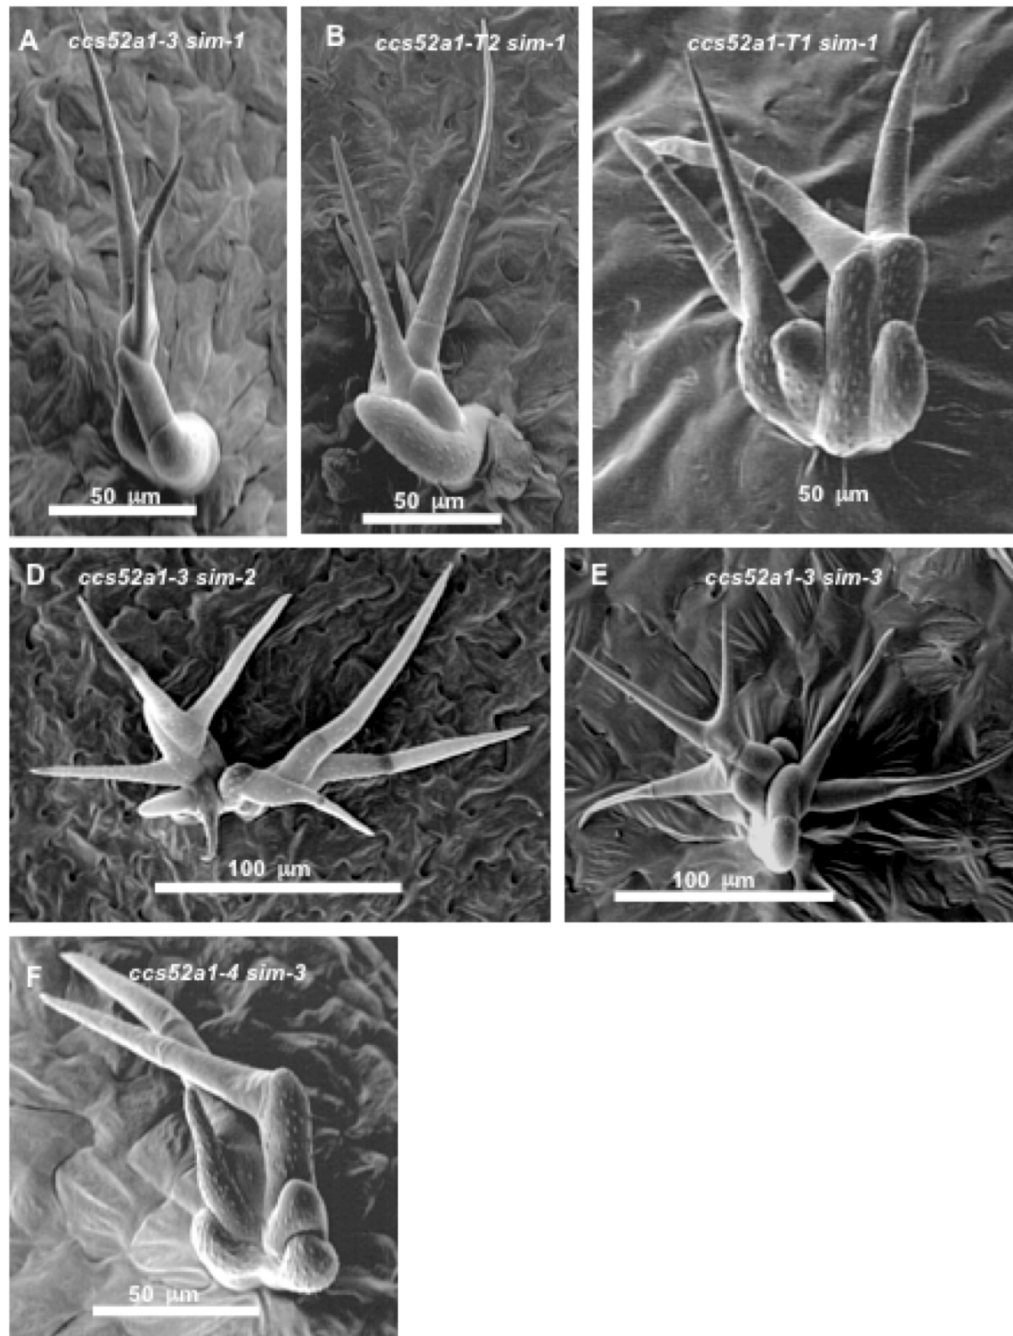

FIGURE S1.—Genetic interaction between *ccs52a1* and *sim* is not allele-specific. (A) *ccs52a1-3 sim-1*. (B) *ccs52a1-T2 sim-1*. (C) *ccs52a1-T1 sim-1*. (D) *ccs52a1-3 sim-2*. (E) *ccs52a1-3 sim-3*. (F) *ccs52a1-4 sim-3*. All images are scanning electron micrographs. Scale bars in (A), (B), (C) and (F) are 50 μm, and in (D) and (E), 100 μm.
