# Supplementary material for: SIAMESE Cooperates With the CDH1-like Protein CCS52A1 to Establish Endoreplication in Arabidopsis thaliana Trichomes
Source: Oxford University Press journal article supplement (doi:10.1534/genetics.109.113274), 2010-03-02
Supplement: tables1.pdf [file tables1.pdf]

**TABLE S1**  
**Primers Used For Mapping and Cloning**

| Primer    | Sequence                          | Purpose                             |
|-----------|-----------------------------------|-------------------------------------|
| F7H19-3aF | 5'-GCTAATGCGTCGTAGTGT-3'          | F7H19 CAPS marker                   |
| F7H19-3aR | 5'-GCAGAACGACTCCTGAAT-3'          | F7H19 CAPS marker                   |
| T12H17-2F | 5'-AACCATCCATAGCCGCCG-3'          | T12H17 CAPS marker                  |
| T12H17-2R | 5'-CGACATCTCCTTGCGTTGTGG-3'       | T12H17 CAPS marker                  |
| ENS2-1CF  | 5'-CACCAGGTGTCAATGGTGGGTC-3'      | CCS52A1 genomic for complementation |
| ENS2-1CR3 | 5'-GTCGGTGTAACGGTGAGAAAC-3'       | CCS52A1 genomic for complementation |
| ENS2-1F   | 5'-CACCATGGAAGAAGAAGATCCTACAGC-3' | CCS52A1 coding                      |
| ENS2-1R1  | 5'-TTCTCACCGAATTGTTGTTCTACC-3'    | CCS52A1 coding                      |

Primers ENS2-1CF, ENS2-1F, have the sequence 5'-CACC-3' at their 5' ends for directional cloning into the GATEWAY entry vector pENTR/D-TOPO (Invitrogen).
